# Supplementary material for: Amalgamation-based AuHgPt nanochains as electrocatalysts for the hydrogen evolution reaction
Source: Royal Society of Chemistry journal article supplement (doi:10.1039/d4ta05900j), 2024-01-01
Supplement: d4ta05900j1.pdf [file d4ta05900j1.pdf]

## Amalgamation-based AuHgPt Nanochains as Electrocatalysts for Hydrogen Evolution Reaction

Pengfei Cao, Congcong Xu, Lei Zhang, Jinyuan Li, Shi-Bo Cheng\*, Meng Lin\*

School of Chemistry and Chemical Engineering, Shandong University, Jinan 250100, P. R.  
China.

\*Corresponding authors: (M. Lin) [mclin@sdu.edu.cn](mailto:mclin@sdu.edu.cn); (S. Cheng) [shibocheng@sdu.edu.cn](mailto:shibocheng@sdu.edu.cn).

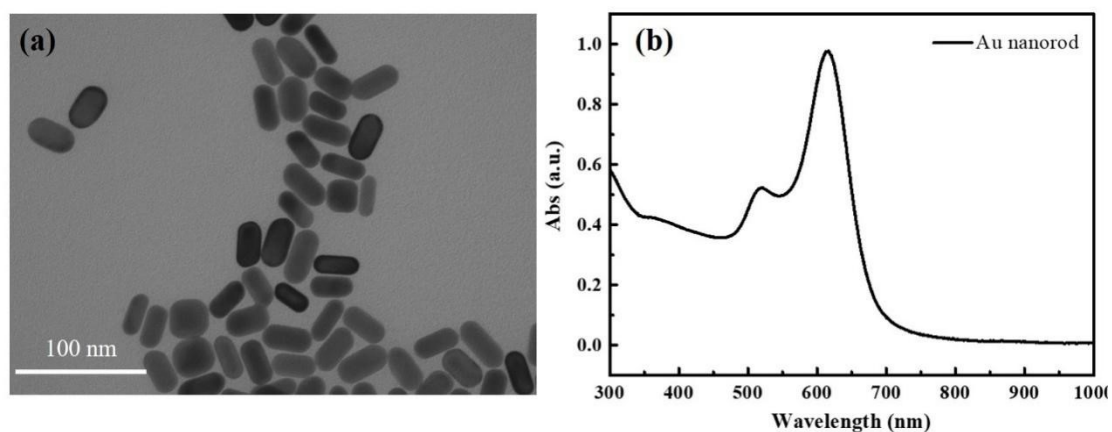

Fig. S1 (a) TEM image and (b) corresponding UV-Vis absorption spectra of Au NRs synthesized by seed-mediated method.

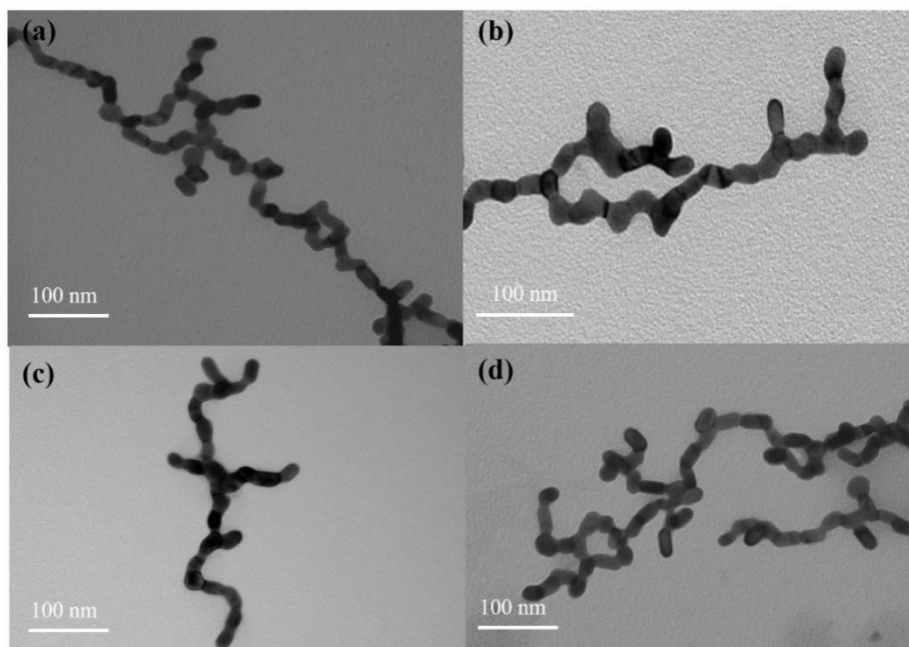

Fig. S2 (a)-(d) TEM images of AuHgPt-1, AuHgPt-2, AuHgPt-3 and AuHgPt-4.

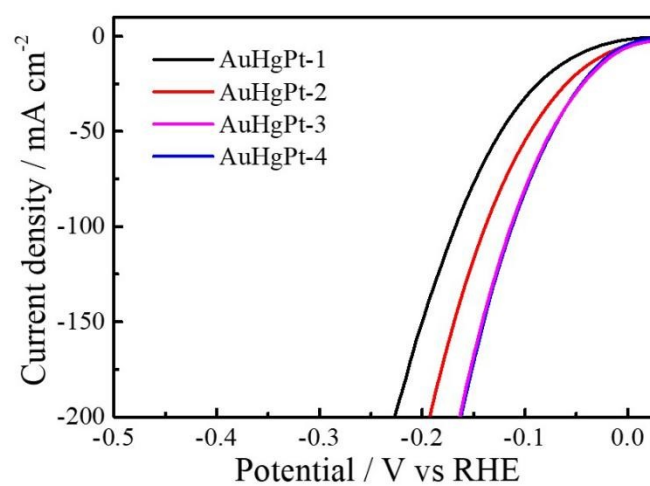

Fig. S3 HER polarization curves of AuHgPt-1, AuHgPt-2, AuHgPt-3 and AuHgPt-4.

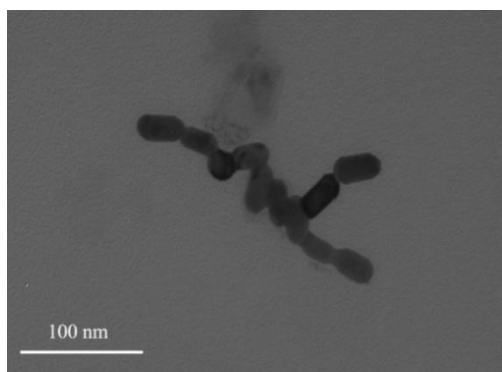

Fig. S4 TEM image of AuHgPt nanochains after electrochemical test.

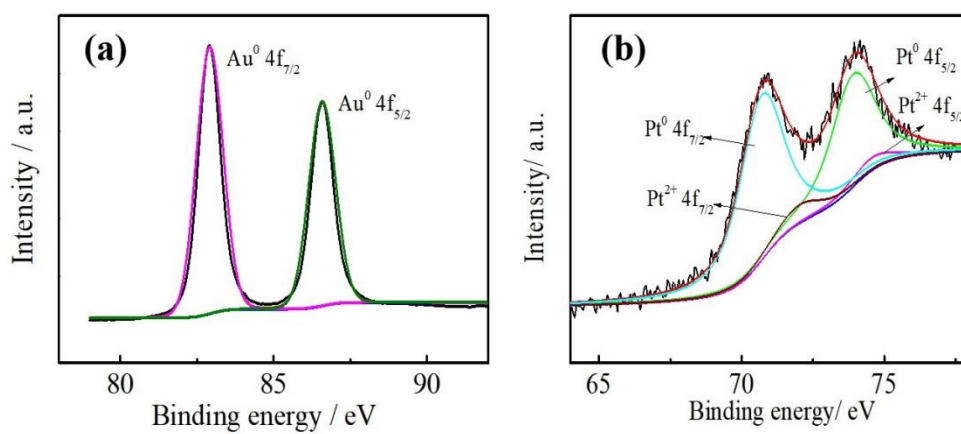

Fig. S5 X-ray photoelectron spectra of Au 4f, Pt 4f (a-b) after stability test.

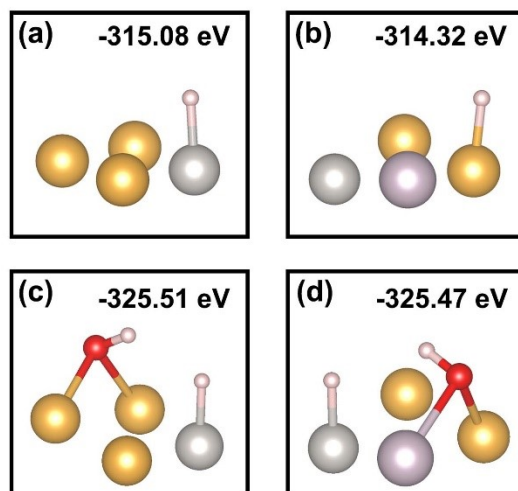

Fig. S6. (a) and (b) The adsorption configuration and the total energy of H adsorbed on Pt and Au sites of AuHgPt, respectively. (c) and (d) The atomic configuration and the total energy of H and OH co-adsorption on AuHgPt, with H adsorbed on Pt site and OH adsorbed at Au bridge and Hg-Au bridge site, respectively.

Table S1. Summary of the HER activity of Pt-based alloys used in alkaline solutions.

| Electrocatalyst             | Overpotential (mV) | Tafel slope (mV·dec <sup>-1</sup> ) | Reference |
|-----------------------------|--------------------|-------------------------------------|-----------|
| PtNi <sub>5</sub>           | 26.8               | 19.2                                | 1         |
| PtFeNiCuCo                  | 27                 | 34.7                                | 2         |
| PtCo@PtSn                   | 25                 | 24                                  | 3         |
| Pt@Ni <sub>2</sub> -rGO     | 37                 | 43                                  | 4         |
| PtSe <sub>2</sub> /Pt       | 42                 | 53                                  | 5         |
| PtNi <sub>10</sub> /C       | 66                 | 16.73                               | 6         |
| PtRu/CNT@CeO <sub>2-x</sub> | 75                 | 38                                  | 7         |
| Pt/Co-N-C                   | 33                 | 36.8                                | 8         |
| AuHgPt                      | 23                 | 47.72                               | This work |

**Reference:**

1. C. Zhang, X. Liang, R. N. A. Xu, C. N. Dai, B. Wu, G. Q. Yu, B. H. Chen, X. L. Wang, N. Liu, H<sub>2</sub> in situ inducing strategy on Pt surface segregation over low Pt doped PtNi<sub>5</sub> nanoalloy with superhigh alkaline HER activity. *Adv. Funct. Mater.* 2021, **31**, 2008298.
2. S. Liu, T. Gan, J. Wu, X. Yang, H. Liu, Z. Chen, Synthesis of cube-shaped PtFeNiCuCo alloy catalyst towards high performance alkaline hydrogen evolution. *J. Phys., Conf. Ser.* 2022, **2254**, 012006.
3. J. L. Chen, G. F. Qian, H. Zhang, S. Q. Feng, Y. S. Mo, L. Luo, S. B. Yin, PtCo@PtSn heterojunction with high stability/activity for pH-universal H<sub>2</sub> evolution. *Adv. Funct. Mater.* 2022, **32**, 210759.
4. W. Xu, J. Chang, Y. Cheng, H. Liu, J. Li, Y. Ai, Z. Hu, X. Zhang, Y. Wang, Q. Liang, Y. Yang, H. Sun. A multi-step induced strategy to fabricate core-shell Pt-Ni alloy as symmetric electrocatalysts for overall water splitting. *Nano Res.* 2022, **15**, 965–971.
5. Z. Wang, B. Xiao, Z. Lin, Y. Xu, Y. Lin, F. Meng, Q. Zhang, L. Gu, B. Fang, S. Guo, W. Zhong. PtSe<sub>2</sub>/Pt heterointerface with reduced coordination for boosted

- hydrogen evolution reaction. *Angew. Chem. Int. Ed.* 2021, **60**, 23388–23393
6. L. M. Zeng, T. X. Yuan, Z. R. Liu, Y. Y. Zhu, D. F. Wu, D. X. Wang, Q. Zhou, R. H. Tang, Alloying Pt into Ni partially amorphous for promoted alkaline hydrogen production. *J. Colloid Interface Sci.* 2023, **634**, 897–905.
  7. C. Zhou, K. Ma, Z. Zhuang, M. Ran, G. Shu, C. Wang, L. Song, L. Zheng, H. Yue, D. Wang, Tuning the local environment of Pt species at CNT@MO<sub>2-x</sub> (M = Sn and Ce) heterointerfaces for boosted alkaline hydrogen evolution. *J. Am. Chem. Soc.* 2024, **146**, 21453–21465.
  8. S. Hong, J. H. Kim, D. Shin, G. Bak, D. Jang, W. B. Kim, Y. J. Hwang, Synergistic effect of Pt-loaded Co-N-C electrocatalysts for hydrogen evolution reaction in alkaline conditions. *Appl. Surf. Sci.* 2023, **610**, 155523.
